# Supplementary material for: Life Stressors in Young Americans are Linked via Asymmetric U-Shapes to Mental Health Severity
Source: Research Square preprint supplement (doi:10.21203/rs.3.rs-9464871/v1), 2026-05-12
Supplement: Supplementary file 1 [file 30099d69fdc77c5a748f7df4.docx]

**APPENDIX**

**Supplemental Table 1.** Variables selected for analysis from the NLSY97 survey

| **Category** | **Original Variable Name** | | **Explanation** | **Survey Year(s)** |
| --- | --- | --- | --- | --- |
| **Mental Health Symptoms Components (outcome)** | CV_CESD_SCORE_R19_2019 | 7-item CES-D Score with a range from 0 to 21 | | 2019-2020 |
|  | CV_CESD_SCORE_R20_2021 | 7-item CES-D Score with a range from 0 to 21 | | 2021-2022 |
|  | CVC_GAD7_SCORE_3839 | Generalized Anxiety Disorder Scale scoring | | 2019-2022 (When respondent turned 38 or 39) |
| **Demographics** | KEY_SEX_1997 | Sample Type | | 1997-1998 |
|  | KEY_RACE_ETHNICITY_1997 | Race/Ethnicity | | 1997-1998 |
|  | CVC_HIGHEST_DEGREE_EVER_XRND | Highest Education Level | | Cross-Round |
| **Relationship Variables** | YSAQ2-707_* | Relationship Breakdowns | | 2003–2011 |
|  | MAR_COHABITATION_* | Total Cohabitations by 2015 | | 2015 |
|  | MAR_COHABITATION_* | Total Marriages by 2015 | | 2015 |
|  | CV_BIO_CHILD_HH_2015,  CV_BIO_CHILD_NR_2015 | Total Biological Children by 2015 | | 2015 |
| **Income Variables** | YINC-1700_* | Personal income from wages and salary | | 2007–2022 |
| **Deceased Relatives** | YHEA-2320~* | Deceased close relatives (mother/father, sibling, child, partner/souse) | | 2002–2013 |


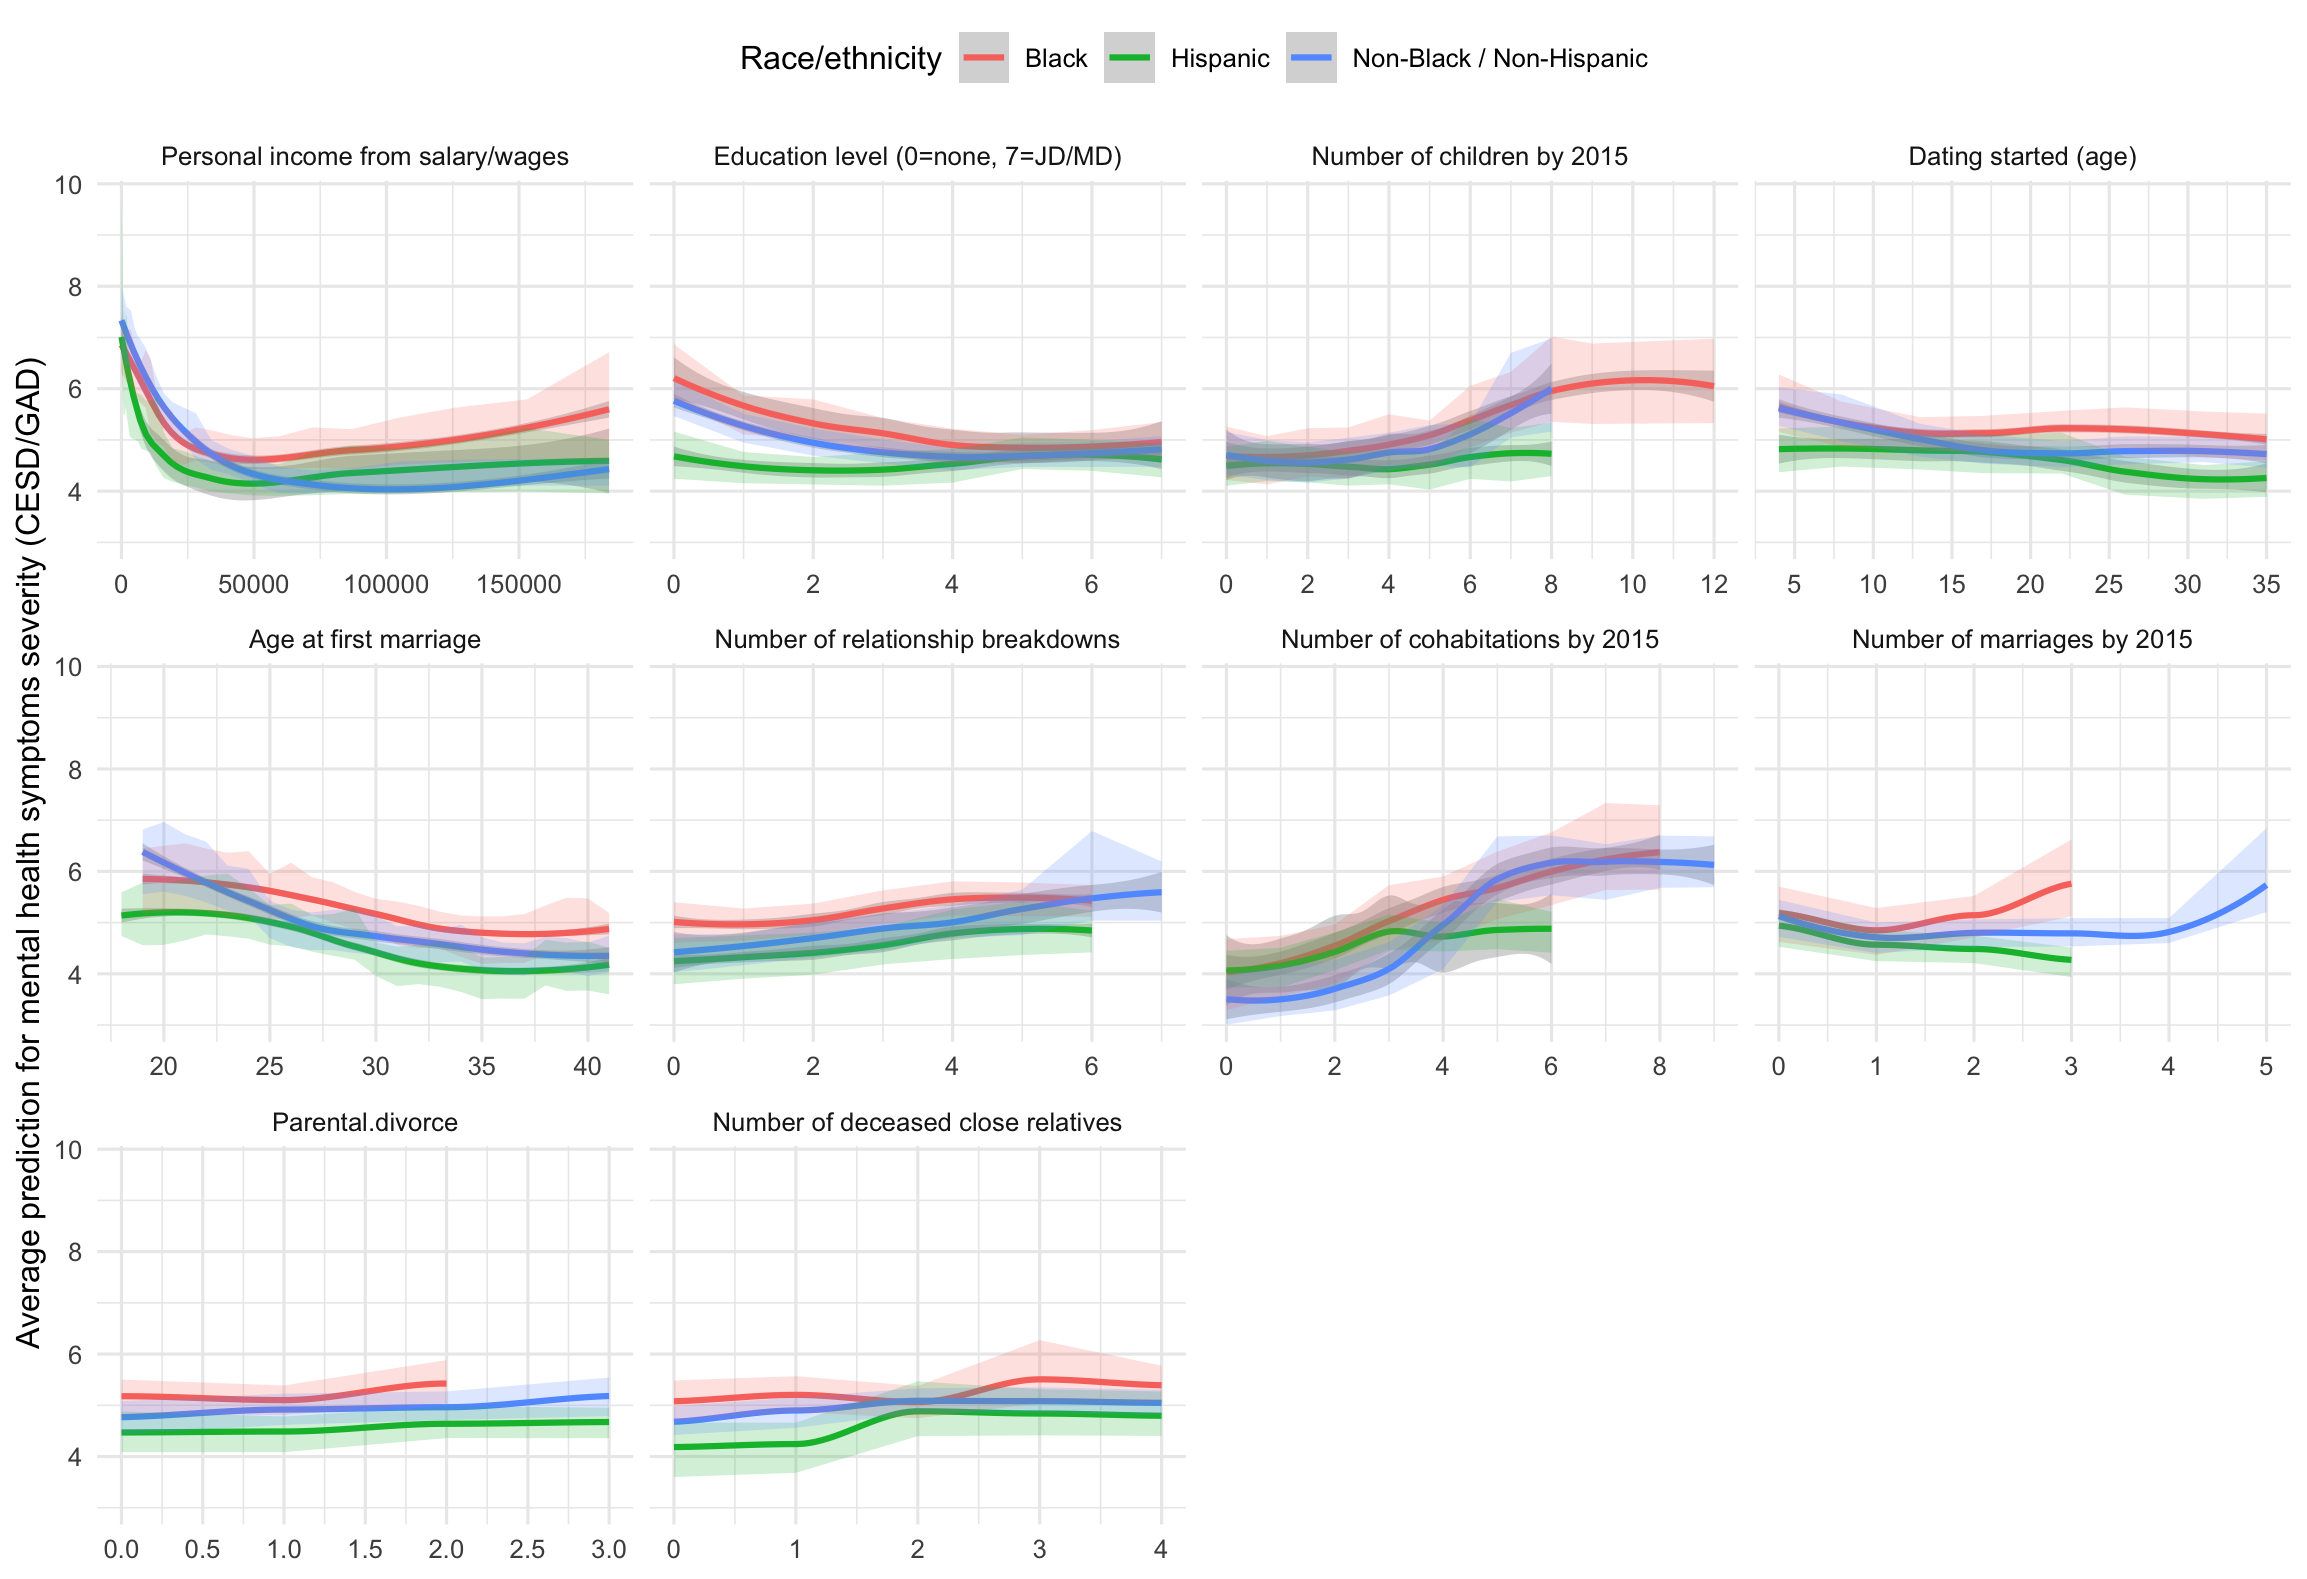


Supplemental Figure 2. Results stratified by race/ethnicity


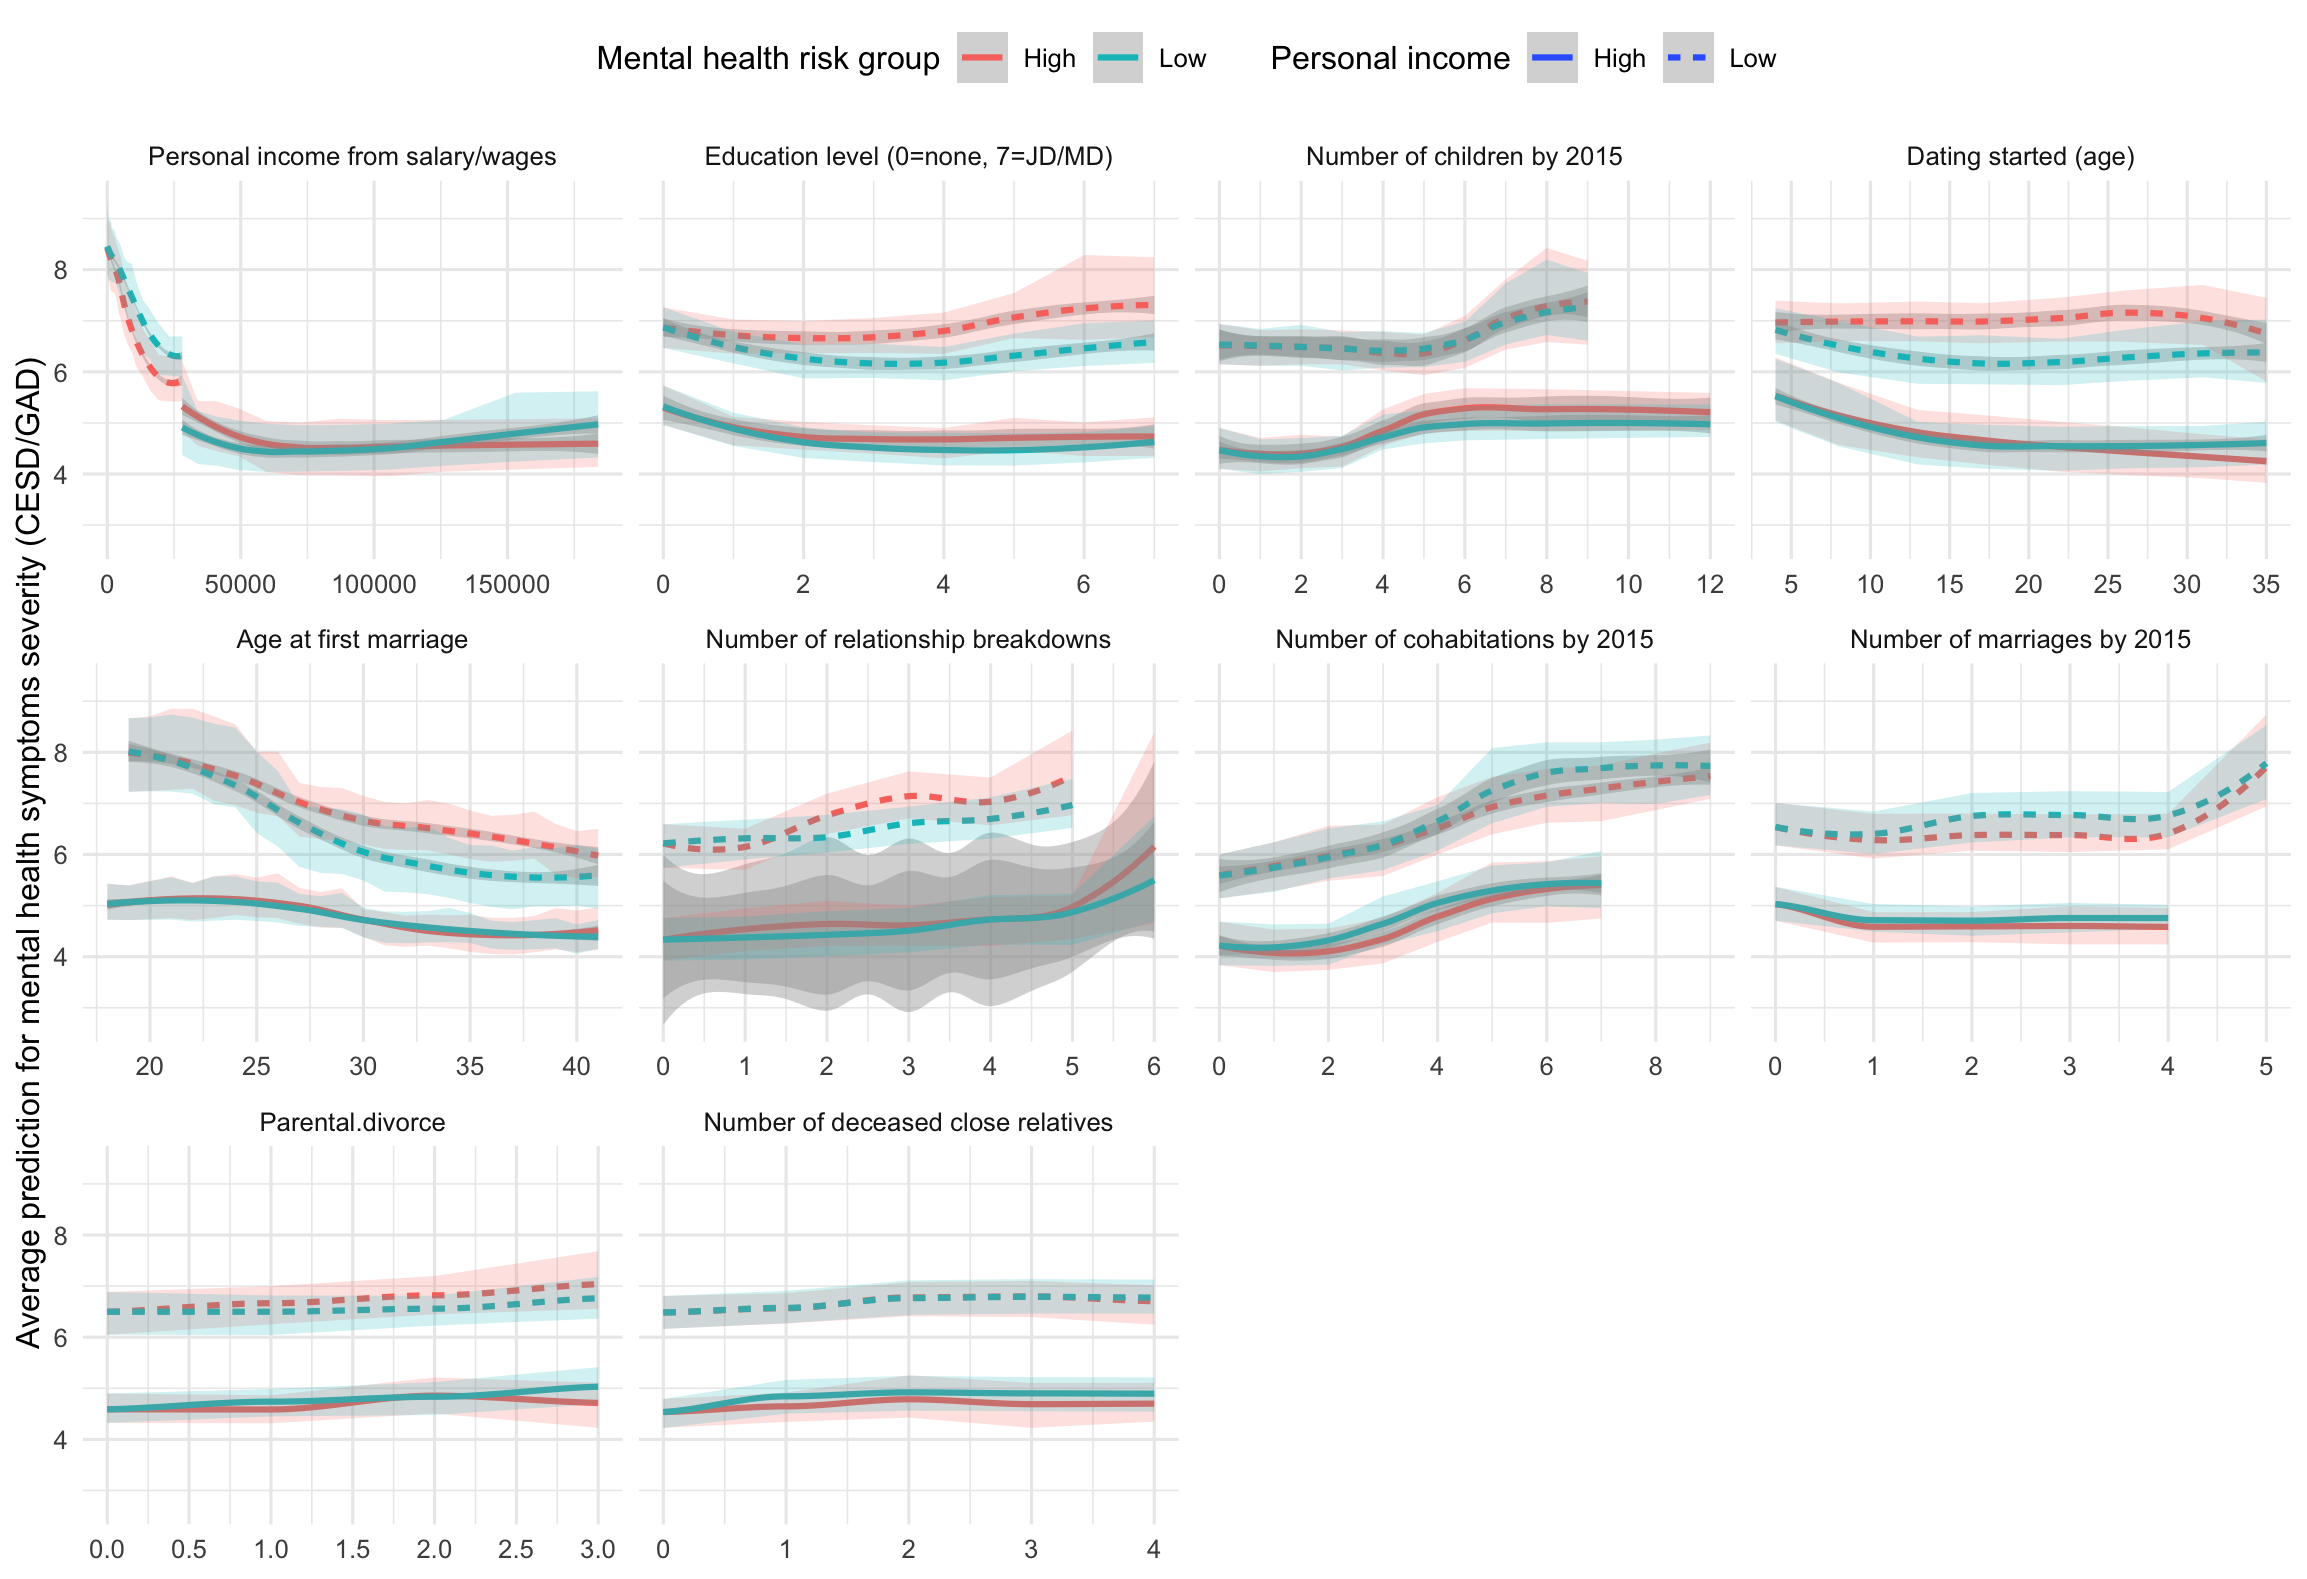


Supplemental Figure 3. Results stratified by baseline mental health risk/ethnicity
